# Supplementary material
Source: Springer Nature journal article supplement (https://www.springermedizin.de/resource/supplementary/12885_2013_4651_MOESM2_ESM.pdf/9466806)

**A.**

Control

Panc-1

HPAFII

BxPc-3

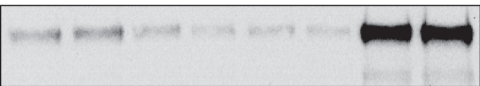

COX-2

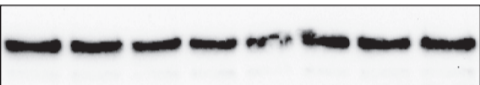

GAPDH

**B.**

Control

BxPc-3

BxPc-3  
+Il-1Ra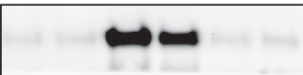

COX-2

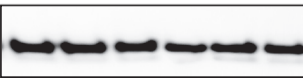

GAPDH

Supplement: MOESM2 [file 9466806]
